# Supplementary material
Source: publisher figshare collection journal article supplement (https://karger.figshare.com/ndownloader/files/30604548)
Supplement: Supplementary file 1 [file 30604548]

**Supplementary**

Allergens associated with asthma [7]

Cockroach, Dander (cat, dog), House dust mite (*Dermatophagoides pteronyssinus*, *Dermatophagoides farina*), Mold spores (*Alternaria, Cladosporium, Helminthosporium, Aspergillus, Penicillium*) and Pollens (reginal tree, grass, and weed pollen).
